# Supplementary material for: The Listeria monocytogenes PASTA Kinase PrkA and Its Substrate YvcK Are Required for Cell Wall Homeostasis, Metabolism, and Virulence
Source: PLoS Pathog. 2016 Nov 2;12(11):e1006001. doi: 10.1371/journal.ppat.1006001 (PMC5091766; doi:10.1371/journal.ppat.1006001)
Supplement: S1 Table — L. monocytogenes (top) and E. coli (bottom) strains used in this study. Strain designation, genotype, and source is listed left to right. (XLSX) [file ppat.1006001.s006.xlsx]

## Sheet: Sheet1
S1 Table
Strains used in this study
Strain	Genotype	Source
Listeria monocytogenes
JDS1	wild-type 10403S	lab stock
JDS342	ΔprkA pPL2e_riboE_prkA	45
JDS18	wild-type pBHE573	16
JDS19	Δhly pBHE573	16
JDS20	Holin Lysin pBHE573	16
JDS21	ΔyvcK pBHE573	16
JDS352	ΔprkA pPL2e_riboE_prkA pBHE573	this study
JDS22	Holin Lysin	16
JDS25	ΔyvcK	16
JDS258	ΔyvcK pPL2e_riboE_yvcK	this study
JDS43	L.p. FlaA	20
JDS37	LLO S44A L261T	53
JDS1008	yvcK T252A T256A knock in	this study
JDS1009	yvcK T252E T256E knock in	this study
JDS1010	yvcK T252A T256A knock in pBHE573	this study
JDS1011	yvcK T252E T256E knock in pBHE573	this study
JDS237	prfA*	[104]
JDS1012	prfA* ΔprkA	this study
JDS1013	prfA* ΔyvcK	this study
JDS163	ΔpgdA ΔoatA	57
DAP202	yvcK pIMK2 empty	this study
DAP203	yvcK pIMK2 yvcK	this study
JDS34	phage cured 10403S	100
JDS389	phage cured ΔprkA pPL2e_riboE_prkA	this study
DAP215	prkA pPL1k_prkA	this study
E. coli
JDS17	SM10 pBHE573	16
JDS98	XL1-blue pPL2e	103
JDS242	SM10 pPL2e_riboE_prkA	45
JDS1007	XL1-blue pPL2e_riboE_yvcK	this study
JDS1017	SM10 pPL2e_riboE_yvcK	this study
JDS1018	XL1-blue pPL2e_riboE_yvcK_T252A	this study
JDS1019	XL1-blue pPL2e_riboE_yvcK_T256A	this study
JDS1020	XL1-blue pPL2e_riboE_yvcK_T252A_T256A	this study
JDS285	Rosetta pLysS pGex-2T prkA kinase domain (337)	45
JDS158	XL1-blue pET20b_YvcK	this study
JDS1021	XL1-blue pET20b_YvcK_T252A	this study
JDS1022	XL1-blue pET20b_YvcK_T256A	this study
JDS1023	XL1-blue pET20b_YvcK_T252A_T256A	this study
JDS1024	Rosetta pLysS pET20b_yvcK	this study
JDS1025	Rosetta pLysS pET20b_yvcK_T256A	this study
JDS1026	Rosetta pLysS pET20b_yvcK_T252A	this study
JDS1027	Rosetta pLysS pET20b_yvcK_T252A_T256A	this study
JDS1028	XL1-blue pKSV7 yvcK T252A T256A knock in	this study
JDS1029	XL1-blue pKSV7 yvcK T252E T256E knock in	this study
JDS523	Top10 pIMK2	101
JDS1030	XL1-blue pIMK2_yvcK	this study
JDS1031	S17 pIMK2_yvcK	this study
JDS1032	S17 pIMK2	this study
JDS1033	XL1-blue pIMK2_prkA	this study
JDS96	XL1-blue pPL1	100
JDS1034	XL1-blue pPL1k	this study
JDS1035	XL1-blue pPL1k_prkA	this study
JDS1036	S17 pPL1k_prkA	this study
